# Supplementary material for: Transition in inherited metabolic diseases: the dietitians, pediatricians and adult physicians’ point of view: the results of an Italian survey
Source: Springer Nature journal article supplement (doi:10.1186/s13023-025-03755-8), 2025-05-22
Supplement: MOESM1 [file 13023_2025_3755_MOESM1_ESM.pdf]

# Survey MME

Gentile Collega,  
di seguito troverà le domande relative alla transizione dei pazienti con MME.  
Ogni risposta sarà un importante contributo a questa indagine multicentrica.

Qualora ci fossero dubbi o domande potrà salvare le risposte già confermate (seguendo le apposite indicazioni) e  
scriverci, per poi riprendere la survey in un secondo momento.

Grazie e buona compilazione!

|                  |                                                                                                                                                                                                                                                                                                                                                                                                                                                            |
|------------------|------------------------------------------------------------------------------------------------------------------------------------------------------------------------------------------------------------------------------------------------------------------------------------------------------------------------------------------------------------------------------------------------------------------------------------------------------------|
| Affiliazione     | <div></div>                                                                                                                                                                                                                                                                                                                                                                                                                                                |
| Città            | <div></div>                                                                                                                                                                                                                                                                                                                                                                                                                                                |
| Regione          | <div></div>                                                                                                                                                                                                                                                                                                                                                                                                                                                |
| Professione      | <div><div><input type="radio"/> Medico</div><div><input type="radio"/> Dietista</div></div>                                                                                                                                                                                                                                                                                                                                                                |
| Specializzazione | <div><div><input type="radio"/> Pediatria</div><div><input type="radio"/> Neuropsichiatria Infantile</div><div><input type="radio"/> Medicina Interna</div><div><input type="radio"/> Gastroenterologia</div><div><input type="radio"/> Neurologia</div><div><input type="radio"/> Psichiatria</div><div><input type="radio"/> Endocrinologia</div><div><input type="radio"/> Scienza dell'Alimentazione</div><div><input type="radio"/> Altro</div></div> |

Quali delle seguenti malattie metaboliche ereditarie (MME) vengono trattate nel suo Centro? (risposta multipla)

- ☐ DIFETTI CONGENITI DEL METABOLISMO E DEL TRASPORTO DEGLI AMINOACIDI
- ☐ DIFETTI CONGENITI DEL METABOLISMO DEL CICLO DELL'UREA E IPERAMMONIEMIE EREDITARIE
- ☐ DIFETTI CONGENITI DEL METABOLISMO E DEL TRASPORTO DEI CARBOIDRATI
- ☐ IPERINSULINISMI CONGENITI
- ☐ DIFETTI CONGENITI DEL METABOLISMO DELLE LIPOPROTEINE
- ☐ DIFETTI CONGENITI DELLA SINTESI DEL COLESTEROLO, DEGLI ACIDI BILIARI e DEI FOSFOLIPIDI E DEI GLICOSFINGOLIPIDI
- ☐ MALATTIE PEROSSISOMIALI
- ☐ DIFETTI CONGENITI DEL METABOLISMO DEI NEUROTRASMETTITORI E DEI PICCOLI PEPTIDI
- ☐ DIFETTI CONGENITI DEL METABOLISMO DELLE PORFIRINE E DELL'EME
- ☐ DIFETTI CONGENITI DEL METABOLISMO DELLE PURINE E DELLE PIRIMIDINE
- ☐ DIFETTI CONGENITI DEL METABOLISMO ENERGETICO MITOCONDRIALE
- ☐ MALATTIE DA ACCUMULO LISOSOMIALE
- ☐ DIFETTI CONGENITI DELL'ASSORBIMENTO E DEL TRASPORTO DI VITAMINE E COFATTORI NON PROTEICI
- ☐ DIFETTI CONGENITI DEL METABOLISMO E DEL TRASPORTO DI METALLI
- ☐ DIFETTI CONGENITI DEL METABOLISMO E DEL TRASPORTO DELLE PROTEINE

Quanti anni ha il paziente più giovane in follow-up?

\_\_\_\_\_ (anni)

Quanti anni ha il paziente più anziano in follow-up?

\_\_\_\_\_ (anni)

Nella sua Struttura ospedaliera è in vigore un percorso di transizione mirato alla presa in carico del paziente adulto affetto da MME?

- ☐ Sì, riconosciuto ufficialmente
- ☐ Sì ma non riconosciuto ufficialmente
- ☐ No

Da quanti anni è in vigore il percorso di transizione del paziente adulto affetto da MME?

\_\_\_\_\_ (anni)

A che età minima è prevista la transizione del paziente con MME, al Servizio dell'adulto?

- ☐ 16 anni
- ☐ 18 anni
- ☐ Non c'è un'età minima
- ☐ Altro

Specificare

\_\_\_\_\_

A quale Servizio dell'adulto viene fatto transitare il paziente?

- ☐ ad un'unica struttura/UO dello stesso presidio ospedaliero  
☐ a più strutture/UO dello stesso presidio ospedaliero  
☐ ad un'unica struttura/UO di un altro presidio ospedaliero  
☐ a più strutture/UO di un altro presidio ospedaliero

Specifichi il nome e l'area di specializzazione della/delle struttura/UO:

\_\_\_\_\_

Da quale Servizio pediatrico viene fatto transitare il paziente?

- ☐ da un'unica struttura/UO dello stesso presidio ospedaliero  
☐ da più strutture/UO dello stesso presidio ospedaliero  
☐ da un'unica struttura/UO di un altro presidio ospedaliero  
☐ da più strutture/UO di un altro presidio ospedaliero

Specifichi il nome e l'area di specializzazione della/delle struttura/UO:

\_\_\_\_\_

Da quali figure professionali è composta l'équipe che prende in carico il paziente dopo la transizione? (risposta multipla)

- ☐ Pediatra  
☐ Medico/i specialista/i  
☐ Dietista  
☐ Infermiera/e  
☐ Psicologa/o  
☐ Biologa/o  
☐ Ostetrica/o  
☐ Altro

Medico/i specialista/i in:

\_\_\_\_\_

Specificare:

\_\_\_\_\_

Quante visite congiunte sono previste prima della totale presa in carico del paziente da parte del Servizio dell'adulto?

\_\_\_\_\_

Quali figure professionali partecipano alla/e visita/e congiunta/e? (risposta multipla)

- ☐ Pediatra  
☐ Medico/i specialista/i  
☐ Dietista  
☐ Infermiera/e  
☐ Psicologa/o  
☐ Biologa/o  
☐ Ostetrica/o  
☐ Altro

Medico/i specialista/i in:

\_\_\_\_\_

Specificare

\_\_\_\_\_

Dopo la transizione, all'interno dell'equipe, quale figura professionale segue il paziente adulto con MME dal punto di vista nutrizionale?

- ☐ Medico (nel Centro non è prevista il/la dietista)  
☐ Dietista  
☐ Altro

Specificare

\_\_\_\_\_

Quale dietista prende in carico i pazienti adulti con MME dopo la transizione?

- ☐ Stesso/a dietista che segue i pazienti pediatrici con MME (non cambia dopo la transizione)  
☐ Nuovo/a dietista dedicato ai pazienti adulti con MME  
☐ Qualsiasi dietista del servizio di nutrizione (es. attivazione consulenza, dietista non dedicato alle MME)  
☐ Altro

Specificare

\_\_\_\_\_

E' previsto un passaggio di consegne ?

- ☐ Sì, con incontri programmati  
☐ Sì, solo tramite invio di documentazione da remoto  
☐ E' il paziente che provvede a portare la propria documentazione al nuovo professionista  
☐ Non è previsto alcun passaggio di consegne

Quanti pazienti all'anno vengono transitati?

\_\_\_\_\_

È prevista una valutazione psicologica e sociale sullo stato di preparazione alla transizione?

- ☐ Yes  
☐ No

È prevista una valutazione della soddisfazione del paziente/famiglia a qualche mese dall'avvenuta transizione?

- ☐ Yes  
☐ No

È prevista una valutazione della QoL del paziente a qualche mese dall'avvenuta transizione?

- ☐ Yes  
☐ No

Nella sua esperienza, quali difficoltà o ostacoli vengono riscontrati nel percorso di transizione dal punto di vista logistico-organizzativo? (risposta multipla)

- ☐ Difficoltà dovute all'invio dei pazienti in un altro presidio ospedaliero (es. cambio di ospedale con diversa dislocazione)
- ☐ Difficoltà nell'accesso ai dati e alla storia clinica dei pazienti
- ☐ Mancanza di uno/una psicologo/a nel Servizio dell'adulto
- ☐ Mancanza di un/una dietista nel Servizio dell'adulto
- ☐ Difficoltà nel passaggio di informazioni tra i team e/o le strutture/UO
- ☐ Il medico pediatra è restio ad affidare il paziente a un altro medico/struttura
- ☐ Mancanza di formazione/esperienza specifica sulle MME del team del Servizio dell'adulto
- ☐ Mancanza di un setting di cura adeguato ai pazienti adulti (es. mancanza di spazi/strumentazioni idonei a pazienti in età adulta)
- ☐ Mancanza di risorse di laboratorio/programmi specifici per il follow-up del paziente (es. mancanza di un laboratorio analisi specializzato, programmi di prenotazione esami..)
- ☐ Altro

Specificare:

Nella sua esperienza, quali difficoltà od ostacoli vengono riscontrati nel percorso di transizione dal punto di vista del paziente e/o dei genitori/caregivers? (risposta multipla)

- ☐ Il paziente è restio a lasciare la struttura pediatrica e ad accettare un nuovo team
- ☐ I genitori/caregivers sono restii a lasciare la struttura pediatrica e ad accettare un nuovo team
- ☐ Difficoltà a recarsi in un nuovo presidio ospedaliero (es. cambio di ospedale con diversa dislocazione)
- ☐ Il paziente deve responsabilizzarsi nella gestione della propria patologia
- ☐ Il paziente/genitori/caregivers sono restii ad affrontare nuovi aspetti clinici (es. gravidanza..)
- ☐ Mancanza di uno/una psicologo/a nel Servizio dell'adulto
- ☐ Mancanza di un/una dietista nel Servizio dell'adulto
- ☐ Altro

Specificare:

Nella sua esperienza, quali aspetti positivi vengono riscontrati nel percorso di transizione dal punto di vista logistico-organizzativo? (risposta multipla)

- ☐ Percorso assistenziale facilitato (prenotazione esami, consulenze..)
- ☐ Setting di cura adeguato ai pazienti adulti (es. presenza di spazi/strumentazioni idonei a pazienti in età adulta)
- ☐ Adeguate risorse di laboratorio/programmi specifici per il follow-up del paziente
- ☐ Adeguata gestione delle competenze specialistiche di ciascun professionista (es. il pediatra non si occupa più di pazienti adulti)
- ☐ Adeguato passaggio di informazioni tra i team e/o le strutture/UO e accesso ai dati del paziente
- ☐ Altro

Specificare:

---

Nella sua esperienza, quali aspetti positivi vengono riscontrati nel percorso di transizione dal punto di vista del paziente e/o dei genitori/caregivers? (risposta multipla)

- ☐ Setting di cura più adeguato ai pazienti adulti (es. spazi/strumentazioni idonei a pazienti in età adulta)
- ☐ Il paziente/genitori/caregivers possono avere una più specifica presa in carico e affrontare nuovi aspetti clinici (es. gravidanza..)
- ☐ Il paziente può responsabilizzarsi nella gestione della propria patologia
- ☐ Altro

Specificare:

---

Riuscirebbe a quantificare la percentuale di pazienti divenuti adulti che sospendono il rapporto con la Struttura pediatrica di riferimento?

- ☐ meno del 10%
- ☐ tra il 10-25%
- ☐ tra il 25-50%
- ☐ oltre il 50%

Quali sono le principali difficoltà nel mantenere in follow-up sia pazienti pediatrici che adulti? (risposta multipla)

- ☐ Crescente numerosità dei pazienti e del carico di lavoro
- ☐ Minore esperienza sugli aspetti nutrizionali del paziente adulto
- ☐ Mancanza di un medico specialista dell'adulto
- ☐ Organizzazione di percorsi assistenziali specifici per il paziente adulto (terapia enzimatica sostitutiva, gravidanza, ...)
- ☐ Altro

Specificare:

---

Nella sua esperienza, quali sono i principali aspetti negativi dovuti all'assenza di un percorso di transizione dal punto di vista del paziente e/o dei genitori/caregivers? (risposta multipla)

- ☐ Setting di cura non adeguato al paziente adulto (es: mancanza di spazi/strumentazioni idonee)
- ☐ Mancanza di una specifica presa in carico per paziente/genitori/caregivers focalizzata su nuovi possibili aspetti clinici (es: gravidanza, insorgenza di nuove patologie, ...)
- ☐ Scarsa/assente responsabilizzazione del paziente nella gestione della propria patologia
- ☐ Altro

Specificare:

---

Quali pensa siano i principali ostacoli che ad oggi non hanno permesso la realizzazione di un percorso di transizione? (risposta multipla)

- ☐ Individuazione di una idonea struttura/UO a cui transitare i pazienti (dello stesso o di altro presidio ospedaliero)
- ☐ Mancanza di un team con formazione specialistica sulle MME
- ☐ Mancanza di una o più figure professionali (es. medico/dietista/psicologo/infermieri..)
- ☐ Difficoltà nell'individuare tutte le strumentazioni, spazi, risorse necessarie alla presa in carico
- ☐ Altro

Specificare:

È prevista per il futuro l'istituzione di un percorso di transizione ai servizi dell'adulto mirato alla presa in carico del paziente adulto con MME?

- ☐ Sì  
☐ No  
☐ Attualmente non ne sono a conoscenza

Ritiene che sarebbe necessaria l'istituzione di un percorso di transizione ai Servizi dell'adulto?

- ☐ Sì  
☐ No

Per quali patologie ritiene che sarebbe necessaria l'istituzione di un percorso di transizione?

- ☐ Per tutte le MME  
☐ Solo per alcune

Quali? (risposta multipla)

- ☐ DIFETTI CONGENITI DEL METABOLISMO E DEL TRASPORTO DEGLI AMINOACIDI  
☐ DIFETTI CONGENITI DEL METABOLISMO DEL CICLO DELL'UREA E IPERAMMONIEMIE EREDITARIE  
☐ DIFETTI CONGENITI DEL METABOLISMO E DEL TRASPORTO DEI CARBOIDRATI  
☐ IPERINSULINISMI CONGENITI  
☐ DIFETTI CONGENITI DEL METABOLISMO DELLE LIPOPROTEINE  
☐ DIFETTI CONGENITI DELLA SINTESI DEL COLESTEROLO, DEGLI ACIDI BILIARI e DEI FOSFOLIPIDI E DEI GLICOSFINGOLIPIDI  
☐ MALATTIE PEROSSISOMIALI  
☐ DIFETTI CONGENITI DEL METABOLISMO DEI NEUOTRASMETTITORI E DEI PICCOLI PEPTIDI  
☐ DIFETTI CONGENITI DEL METABOLISMO DELLE PORFIRINE E DELL'EME  
☐ DIFETTI CONGENITI DEL METABOLISMO DELLE PURINE E DELLE PIRIMIDINE  
☐ DIFETTI CONGENITI DEL METABOLISMO ENERGETICO MITOCONDRIALE  
☐ MALATTIE DA ACCUMULO LISOSOMIALE  
☐ DIFETTI CONGENITI DELL'ASSORBIMENTO E DEL TRASPORTO DI VITAMINE E COFATTORI NON PROTEICI  
☐ DIFETTI CONGENITI DEL METABOLISMO E DEL TRASPORTO DI METALLI  
☐ DIFETTI CONGENITI DEL METABOLISMO E DEL TRASPORTO DELLE PROTEINE

A quale età minima ritiene che dovrebbe essere fatto transitare il paziente?

- ☐ 16 anni  
☐ 18 anni  
☐ Non c'è un'età minima  
☐ Altro

Specificare:

A quale/i struttura/UE pensa potrebbero essere transitati i pazienti adulti con MME?

- ☐ ad un'unica struttura/UE dello stesso presidio ospedaliero  
☐ a più strutture/UE dello stesso presidio ospedaliero  
☐ ad un'unica struttura/UE di un altro presidio ospedaliero  
☐ a più strutture/UE di un altro presidio ospedaliero

Una volta avvenuta la transizione, chi ritiene che dovrebbe seguire i pazienti adulti dal punto di vista nutrizionale?

- ☐ Stessa/o dietista che segue i pazienti pediatrici con MME
- ☐ Nuova/o dietista dedicato ai pazienti adulti con MME
- ☐ Qualsiasi dietista del servizio di nutrizione clinica (es: attivazione consulenza, dietista non dedicata/o alle MME)
- ☐ Altro

Specificare:

\_\_\_\_\_
